# Supplementary material for: The genetic specificity of specific cognitive abilities after controlling for general cognitive ability
Source: Research Square preprint supplement (doi:10.21203/rs.3.rs-5053719/v1), 2024-12-08
Supplement: Supplementary file 2 [file 9deaf34494e0a694a9619885.xlsx]

## Sheet: Contents
Supplementary Tables
The genetic specificity of specific cognitive abilities after controlling for general cognitive ability
2024
Francesca Procopio1, Engin Keser1, Jacob Knyspel1, Margherita Malanchini1,2, Kaili Rimfeld1,3, Robert Plomin1
1 Social, Genetic and Developmental Psychiatry Centre, Institute of Psychiatry, Psychology and Neuroscience, King’s College London, London, United Kingdom
2 School of Biological and Chemical Sciences, Queen Mary University of London, London, United Kingdom
3 Department of Psychology, Royal Holloway, University of London, Egham, United Kingdom
Contents
Table S1	External Traits
Table S2	Common factor model indices
Table S3	SCA and SCA.g correlation matrices
Table S4	SCA and SCA.g correlation matrices with SE and CI
Table S5	SCA and SCA.g SNP heritability
Table S6	GWA significant hits
Table S7	GWA significant SNPs and lead SNPs non g Memory
Table S8	GWA significant SNPs and lead SNPs non g Reaction
Table S9	GWA significant SNPs and lead SNPs non g Symbol
Table S10	GWA significant SNPs and lead SNPs non g Fluid
Table S11	GWAS catalogue GWA signficant SNPs non g Memory
Table S12	GWAS catalogue GWA signficant SNPs non g Reaction
Table S13	GWAS catalogue GWA signficant SNPs non g Symbol
Table S14	GWAS catalogue GWA signficant SNPs non g Fluid
Table S15	Genomic loci defined by independent lead SNPs non g Memory
Table S16	Genomic loci defined by independent lead SNPs non g Reaction
Table S17	Genomic loci defined by independent lead SNPs non g Symbol
Table S18	Genomic loci defined by independent lead SNPs non g Fluid
Table S19	Gene set analysis non g Memory
Table S20	Gene set analysis non g Reaction
Table S21	Gene set analysis non g Symbol
Table S22	Gene set analysis non g Fluid
Table S23	Gene property analysis (53 specific gene types) non g Memory
Table S24	Gene property analysis (53 specific gene types) non g Reaction
Table S25	Gene property analysis (53 specific gene types) non g Symbol
Table S26	Gene property analysis (53 specific gene types) non g Fluid
Table S27	Correlations between SCA and SCA.g with external GWA summary statistics
Table S28	Correlation matrix between genomic g this paper) with other g/ g-related external GWA summary statatics
Table S29	Correlations between genomic g this paper) and external GWA summary statatics

## Sheet: Supplementary Table S1
Table S1: External Traits
Trait	Author	Year	Category	URL
Age at smoking initation	TAG Consortium	2010	Behavioural	https//pubmed.ncbi.nlm.nih.gov/20418890/
Cigarette per day	Saunders et al.	2022	Behavioural	https//www.nature.com/articles/s41586-022-05477-4#data-availability
Drink per week	Saunders et al.	2022	Behavioural	https//www.nature.com/articles/s41586-022-05477-4#data-availability
Longevity	Timmers et al.	2019	Behavioural	https//elifesciences.org/articles/39856
Number of sexual partners	Linner et al.	2019	Behavioural	https//www.nature.com/articles/s41588-018-0309-3
Risk behaviour composite	Linner et al.	2019	Behavioural	https//www.nature.com/articles/s41588-018-0309-3
Speeding propensity	Linner et al.	2019	Behavioural	https//www.nature.com/articles/s41588-018-0309-3
Aggression	Hill et al.	2021	Behavioural	https//www.nature.com/articles/s41398-021-01480-x
Risk tolerance	Linner et al.	2019	Behavioural	https//www.ncbi.nlm.nih.gov/pubmed/30643258
Tiredness	Deary et al.	2017	Behavioural	https//www.nature.com/articles/mp20175
Birth weight	Horikoshi et al.	2016	BMI height weight	https//www.nature.com/articles/nature19806
BMI	Yengo et al.	2018	BMI height weight	https//academic.oup.com/hmg/article/27/20/3641/5067845
Childhood BMI	Vogelezang et al.	2020	BMI height weight	https//journals.plos.org/plosgenetics/article?id=10.1371/journal.pgen.1008718
Height	Yengo et al.	2022	BMI height weight	https//www.nature.com/articles/s41586-022-05275-y
Waist-to-hip ratio	Shungin et al.	2015	BMI height weight	https//www.ncbi.nlm.nih.gov/pubmed/25673412
Childhood IQ	Benyamin et al.	2014	Cognitive	https//pubmed.ncbi.nlm.nih.gov/23358156/
Cognitive	Demange et al.	2021	Cognitive	https//www.nature.com/articles/s41588-020-00754-2
Cognitive performance	Lee et al.	2018	Cognitive	https//www.nature.com/articles/s41588-018-0147-3
E1	Rajagopal et al.	2023	Cognitive	https//www.ncbi.nlm.nih.gov/pmc/articles/PMC9829693/
E2	Rajagopal et al.	2023	Cognitive	https//www.ncbi.nlm.nih.gov/pmc/articles/PMC9829693/
E3	Rajagopal et al.	2023	Cognitive	https//www.ncbi.nlm.nih.gov/pmc/articles/PMC9829693/
E4	Rajagopal et al.	2023	Cognitive	https//www.ncbi.nlm.nih.gov/pmc/articles/PMC9829693/
EA4	Okbay et al.	2022	Cognitive	https://www.nature.com/articles/s41588-022-01016-z
Self-reported educational attainment	Davies et al.	2016	Cognitive	https://www.nature.com/articles/mp201645#Abs1
Intelligence IQ3)	Savage et al.	2018	Cognitive	https://www.nature.com/articles/s41588-018-0152-6
Non-cognitive	Demange et al.	2021	Cognitive	https//www.nature.com/articles/s41588-020-00754-2
Performance IQ	Eising et al.	2022	Cognitive	https://www.pnas.org/doi/10.1073/pnas.2202764119
Executive Funtion	Hatoum et al.	2022	Cognitive	https//www.biorxiv.org/content/10.1101/674515v2.full.pdf
ADHD	Demontis et al.	2023	Mental Health	https//pubmed.ncbi.nlm.nih.gov/30478444/
non p ADHD	Keser et al.	2024	Mental Health	https//www.medrxiv.org/content/10.1101/2023.12.20.23300292v1
Alcohol use disorder	Mallard et al.	2020	Mental Health	https//doi.org/10.1176/appi.ajp.2020.20091390
non p Alcohol use disorder	Keser et al.	2024	Mental Health	https//www.medrxiv.org/content/10.1101/2023.12.20.23300292v1
Anorexia Nervosa	PGC	2019	Mental Health	https//pubmed.ncbi.nlm.nih.gov/31308545/
non p Anorexia Nervosa	Keser et al.	2024	Mental Health	https//www.medrxiv.org/content/10.1101/2023.12.20.23300292v1
Anxiety	PGC	2019	Mental Health	https//pubmed.ncbi.nlm.nih.gov/31748690/
non p Anxiety	Keser et al.	2024	Mental Health	https//www.medrxiv.org/content/10.1101/2023.12.20.23300292v1
Autism Spectrum Disorder	Grove et al.	2017	Mental Health	https//pubmed.ncbi.nlm.nih.gov/30804558/
non p Autism Spectrum Disorder	Keser et al.	2024	Mental Health	https//www.medrxiv.org/content/10.1101/2023.12.20.23300292v1
Bipolar Disorder	Mullins et al.	2021	Mental Health	https//pubmed.ncbi.nlm.nih.gov/34002096/
non p Bipolar Disorder	Keser et al.	2024	Mental Health	https//www.medrxiv.org/content/10.1101/2023.12.20.23300292v1
Depression	Howard et al.	2019	Mental Health	https//www.nature.com/articles/s41593-018-0326-7
non p Depression	Keser et al.	2024	Mental Health	https//www.medrxiv.org/content/10.1101/2023.12.20.23300292v1
OCD	PGC	2017	Mental Health	https//www.ncbi.nlm.nih.gov/pubmed/28761083
non p OCD	Keser et al.	2024	Mental Health	https//www.medrxiv.org/content/10.1101/2023.12.20.23300292v1
P General Factor of Psychopathology)	Keser et al.	2024	Mental Health	https//www.medrxiv.org/content/10.1101/2023.12.20.23300292v1
PTSD	Nievergelt et al.	2019	Mental Health	https//www.ncbi.nlm.nih.gov/pmc/articles/PMC6783435/
non p PTSD	Keser et al.	2024	Mental Health	https//www.medrxiv.org/content/10.1101/2023.12.20.23300292v1
Schizophrenia	Trubetskoy et al.	2022	Mental Health	https//www.nature.com/articles/s41586-022-04434-5
non p Schizophrenia	Keser et al.	2024	Mental Health	https//www.medrxiv.org/content/10.1101/2023.12.20.23300292v1
Self-rated health	Hill et al.	2016	Mental Health	https//academic.oup.com/ije/article/46/3/994/2670320
Sleep duration	UK Biobank	2017	Mental Health	NA
Total Child Psychiatric problems	Neumann et al.	2022	Mental Health	https//journals.plos.org/plosone/article?id=10.1371/journal.pone.0273116
Tourette Syndrome	Yu et al.	2019	Mental Health	https//pubmed.ncbi.nlm.nih.gov/30818990/
non p Tourette Syndrome	Keser et al.	2024	Mental Health	https//www.medrxiv.org/content/10.1101/2023.12.20.23300292v1
Chronotype	UK Biobank	2017	Personality	NA
Loneliness	Day et al.	2018	Personality	https//www.nature.com/articles/s41467-018-04930-1
Neuroticism	Nagel et al.	2018	Personality	https://www.nature.com/articles/s41588-018-0151-7
Subjective wellbeing	Okbay et al.	2016	Personality	https//www.nature.com/articles/ng.3552#access
Cortex global thickness	Grasby et al.	2020	Physical Health	https//pubmed.ncbi.nlm.nih.gov/32193296/
Cortical surface area	Grasby et al.	2020	Physical Health	https//pubmed.ncbi.nlm.nih.gov/32193296/
Age at Menopause	Day et al.	2015	Physical Health	https//www.ncbi.nlm.nih.gov/pubmed/26414677
Metabolic Syndrome	Walree et al.	2022	Physical Health	https://pubmed.ncbi.nlm.nih.gov/35983957/
Housecome income	Hill et al.	2016	SES traits	https//www.sciencedirect.com/science/article/pii/S0960982216311198
Neighbourhood deprivation	Hill et al.	2016	SES traits	https//www.ncbi.nlm.nih.gov/pubmed/27818178

## Sheet: Supplementary Table S2
Table S2: Common factor model indices
	Common Factor model	Standadised factor loadings		Residual variances of indicators after removing the variance explained by the common factor		Proportion of genetic variance explained by genomic g and genomic s
		Genomic g
	SCA	Estimate	SE	Estimate	SE	Common g)	Specific s)
	Matrix	0.836518	0.0679022	0.300235	0.249828	0.699762	0.300235
	Memory	0.445872	0.0307743	0.801198	0.0522835	0.198802	0.801198
	RT	0.26495	0.0263115	0.929802	0.0375876	0.0701984	0.929802
	Symbol	0.630037	0.0341183	0.603052	0.0582804	0.396947	0.603052
	TMTB	0.8443	0.0345263	0.287157	0.0491431	0.712842	0.287157
	Tower	0.688388	0.0767869	0.526123	0.293903	0.473878	0.526123
	VNR	0.919651	0.030965	0.154242	0.0416901	0.845759	0.154242
	PA	0.696629	0.046376	0.514699	0.142855	0.485292	0.514699
	Nonword reading	0.61587	0.0438701	0.620703	0.101502	0.379296	0.620703
	Nonword repetition	0.476419	0.0670798	0.773026	0.293142	0.226975	0.773026
	Spelling	0.775654	0.0412247	0.39836	0.11073	0.601639	0.39836
	Word reading	0.720874	0.0368286	0.480341	0.0877555	0.51966	0.480341
	Mean	0.659597	0.0447303	0.532411	0.126558	0.467588	0.532411
	Estimate (standard)	the indicator loadings on the common factors.
	Estimate (residual)	the residual variances of the indicators after removing variance explained by the common factor
	Model fit	chisq df p_chisq AIC CFI SRMR
		df 1174.524 54 2.286009e-210 1222.524 0.8614459 0.1914811
	Estimator - DWLS

## Sheet: Supplementary Table S3
Table S3: SCA and SCA.g correlation matrices
	g corrected SCA	Matrix	Memory	Reaction	Symbol	Trail	Tower	Fluid	Phoneme	Nonword	Repetition	Spelling	Word
	Matrix	1	0.1199	-0.0106	-0.2334	0.1168	0.1881	-0.1006	-0.4243	0.2076	-0.5111	-0.2867	0.2904
	Memory	0.1199	1	0.0303	0.4115	0.3337	0.345	-0.3271	-0.4376	-0.603	-0.3656	-0.4526	-0.7164
	Reaction	-0.0106	0.0303	1	0.2179	0.0137	0.0097	-0.5418	-0.1868	-0.1826	-0.0864	-0.2371	-0.1531
	Symbol	-0.2334	0.4115	0.2179	1	0.6637	0.1615	-0.7223	-0.2259	-0.4084	-0.1121	-0.365	-0.5633
	Trail	0.1168	0.3337	0.0137	0.6637	1	0.25	-0.6153	-0.4141	-0.3082	-0.2383	-0.2938	-0.5253
	Tower	0.1881	0.345	0.0097	0.1615	0.25	1	-0.1608	-0.2541	0.1316	-0.1952	-0.6872	-0.5495
	Fluid	-0.1006	-0.3271	-0.5418	-0.7223	-0.6153	-0.1608	1	0.2325	0.0594	0.2754	0.155	0.332
	Phoneme	-0.4243	-0.4376	-0.1868	-0.2259	-0.4141	-0.2541	0.2325	1	0.315	0.4736	0.5427	0.0759
	Nonword	0.2076	-0.603	-0.1826	-0.4084	-0.3082	0.1316	0.0594	0.315	1	0.1494	0.2413	0.7519
	Repetition	-0.5111	-0.3656	-0.0864	-0.1121	-0.2383	-0.1952	0.2754	0.4736	0.1494	1	0.1519	-0.1826
	Spelling	-0.2867	-0.4526	-0.2371	-0.365	-0.2938	-0.6872	0.155	0.5427	0.2413	0.1519	1	0.5803
	Word	0.2904	-0.7164	-0.1531	-0.5633	-0.5253	-0.5495	0.332	0.0759	0.7519	-0.1826	0.5803	1
	Uncorrected SCA	Matrix	Memory	Reaction	Symbol	Trail	Tower	Fluid	Phoneme	Nonword	Repetition	Spelling	Word
	Matrix	1	0.481	0.1455	0.5524	0.686	0.6284	0.8657	0.7322	0.4019	0.4569	0.6121	0.505
	Memory	0.481	1	0.219	0.5894	0.6192	0.7126	0.4315	0.1031	-0.0849	0.0382	0.0858	-0.0205
	Reaction	0.1455	0.219	1	0.3567	0.3104	0.2241	0.1687	0.163	0.0694	0.2164	0.0845	0.1342
	Symbol	0.5524	0.5894	0.3567	1	0.8155	0.6416	0.5504	0.1802	0.167	0.0444	0.2837	0.2606
	Trail	0.686	0.6192	0.3104	0.8155	1	0.6654	0.7452	0.4488	0.3934	0.3432	0.5686	0.4534
	Tower	0.6284	0.7126	0.2241	0.6416	0.6654	1	0.6403	0.2857	0.0697	0.0359	0.4205	0.2562
	Fluid	0.8657	0.4315	0.1687	0.5504	0.7452	0.6403	1	0.6821	0.6335	0.493	0.7297	0.7796
	Phoneme	0.7322	0.1031	0.163	0.1802	0.4488	0.2857	0.6821	1	0.9524	0.5827	1.0707	1.0304
	Nonword	0.4019	-0.0849	0.0694	0.167	0.3934	0.0697	0.6335	0.9524	1	0.2387	0.9114	0.9424
	Repetition	0.4569	0.0382	0.2164	0.0444	0.3432	0.0359	0.493	0.5827	0.2387	1	0.5896	0.7431
	Spelling	0.6121	0.0858	0.0845	0.2837	0.5686	0.4205	0.7297	1.0707	0.9114	0.5896	1	0.9596
	Word	0.505	-0.0205	0.1342	0.2606	0.4534	0.2562	0.7796	1.0304	0.9424	0.7431	0.9596	1
	SCA	rG between SCA before and after g- correction	SE
	Matrix	0.6232	0.3776
	Memory	0.8903	0.0587
	RT	0.9579	0.0483
	Symbol	0.8681	0.0897
	TMTB	0.5124	0.0885
	Tower	0.9312	0.487
	VNR	0.3058	0.0507
	PA	0.8447	0.137
	Nonwread	0.9185	0.1036
	Nonwrep	1.0076	0.2185
	Spelling	0.6628	0.1297
	Wordreading	0.7595	0.1174

## Sheet: Supplementary Table S4
Table S4: SCA and SCA.g correlation matrices with SE and CI
	SCA.g	SCA.g	Correlation	SE		SCA	SCA	Correlation	SE		Correlation Difference	Lower SCA.g	Upper SCA.g	Lower SCA	Upper SCA	Overlap CI or Not
	Matrix	Memory	0.1199	0.0777		Matrix	Memory	0.481	0.0833		-0.3611	-0.032392	0.272192	0.317732	0.644268	No
	Matrix	Reaction	-0.0106	0.0668		Matrix	Reaction	0.1455	0.0732		-0.1561	-0.141528	0.120328	0.002028	0.288972	Overlap
	Matrix	Symbol	-0.2334	0.1043		Matrix	Symbol	0.5524	0.093		-0.7858	-0.437828	-0.028972	0.37012	0.73468	No
	Matrix	Trail	0.1168	0.1122		Matrix	Trail	0.686	0.0927		-0.5692	-0.103112	0.336712	0.504308	0.867692	No
	Matrix	Tower	0.1881	0.2095		Matrix	Tower	0.6284	0.2221		-0.4403	-0.22252	0.59872	0.193084	1.06372	Overlap
	Matrix	Fluid	-0.1006	0.1123		Matrix	Fluid	0.8657	0.0724		-0.9663	-0.320708	0.119508	0.723796	1.0076	No
	Matrix	Phoneme	-0.4243	0.1137		Matrix	Phoneme	0.7322	0.1478		-1.1565	-0.647152	-0.201448	0.442512	1.02189	No
	Matrix	Nonwread	0.2076	0.1053		Matrix	Nonwread	0.4019	0.1283		-0.1943	0.001212	0.413988	0.150432	0.653368	Overlap
	Matrix	Repetition	-0.5111	0.1471		Matrix	Repetition	0.4569	0.2015		-0.968	-0.799416	-0.222784	0.06196	0.85184	No
	Matrix	Spelling	-0.2867	0.1268		Matrix	Spelling	0.6121	0.1491		-0.8988	-0.535228	-0.038172	0.319864	0.904336	No
	Matrix	Word	0.2904	0.1283		Matrix	Word	0.505	0.1065		-0.2146	0.038932	0.541868	0.29626	0.71374	Overlap
	Memory	Reaction	0.0303	0.0356		Memory	Reaction	0.219	0.0279		-0.1887	-0.039476	0.100076	0.164316	0.273684	No
	Memory	Symbol	0.4115	0.0617		Memory	Symbol	0.5894	0.0471		-0.1779	0.290568	0.532432	0.497084	0.681716	Overlap
	Memory	Trail	0.3337	0.067		Memory	Trail	0.6192	0.0467		-0.2855	0.20238	0.46502	0.527668	0.710732	No
	Memory	Tower	0.345	0.1076		Memory	Tower	0.7126	0.096		-0.3676	0.134104	0.555896	0.52444	0.90076	Overlap
	Memory	Fluid	-0.3271	0.0652		Memory	Fluid	0.4315	0.0317		-0.7586	-0.454892	-0.199308	0.369368	0.493632	No
	Memory	Phoneme	-0.4376	0.0684		Memory	Phoneme	0.1031	0.0694		-0.5407	-0.571664	-0.303536	-0.032924	0.239124	No
	Memory	Nonwread	-0.603	0.0662		Memory	Nonwread	-0.0849	0.0594		-0.5181	-0.732752	-0.473248	-0.201324	0.031524	No
	Memory	Repetition	-0.3656	0.0794		Memory	Repetition	0.0382	0.0903		-0.4038	-0.521224	-0.209976	-0.138788	0.215188	No
	Memory	Spelling	-0.4526	0.0699		Memory	Spelling	0.0858	0.0586		-0.5384	-0.589604	-0.315596	-0.029056	0.200656	No
	Memory	Word	-0.7164	0.0766		Memory	Word	-0.0205	0.0503		-0.6959	-0.866536	-0.566264	-0.119088	0.078088	No
	Reaction	Symbol	0.2179	0.0413		Reaction	Symbol	0.3567	0.0338		-0.1388	0.136952	0.298848	0.290452	0.422948	Overlap
	Reaction	Trail	0.0137	0.0506		Reaction	Trail	0.3104	0.0343		-0.2967	-0.085476	0.112876	0.243172	0.377628	No
	Reaction	Tower	0.0097	0.0806		Reaction	Tower	0.2241	0.0783		-0.2144	-0.148276	0.167676	0.070632	0.377568	Overlap
	Reaction	Fluid	-0.5418	0.0449		Reaction	Fluid	0.1687	0.0235		-0.7105	-0.629804	-0.453796	0.12264	0.21476	No
	Reaction	Phoneme	-0.1868	0.0495		Reaction	Phoneme	0.163	0.0547		-0.3498	-0.28382	-0.08978	0.055788	0.270212	No
	Reaction	Nonwread	-0.1826	0.0496		Reaction	Nonwread	0.0694	0.052		-0.252	-0.279816	-0.085384	-0.03252	0.17132	No
	Reaction	Repetition	-0.0864	0.0601		Reaction	Repetition	0.2164	0.0793		-0.3028	-0.204196	0.031396	0.060972	0.371828	No
	Reaction	Spelling	-0.2371	0.0554		Reaction	Spelling	0.0845	0.0513		-0.3216	-0.345684	-0.128516	-0.016048	0.185048	No
	Reaction	Word	-0.1531	0.0588		Reaction	Word	0.1342	0.0456		-0.2873	-0.268348	-0.037852	0.044824	0.223576	No
	Symbol	Trail	0.6637	0.0902		Symbol	Trail	0.8155	0.0579		-0.1518	0.486908	0.840492	0.702016	0.928984	Overlap
	Symbol	Tower	0.1615	0.1363		Symbol	Tower	0.6416	0.1033		-0.4801	-0.105648	0.428648	0.439132	0.844068	No
	Symbol	Fluid	-0.7223	0.0827		Symbol	Fluid	0.5504	0.0344		-1.2727	-0.884392	-0.560208	0.482976	0.617824	No
	Symbol	Phoneme	-0.2259	0.0841		Symbol	Phoneme	0.1802	0.0761		-0.4061	-0.390736	-0.061064	0.031044	0.329356	No
	Symbol	Nonwread	-0.4084	0.07		Symbol	Nonwread	0.167	0.0674		-0.5754	-0.5456	-0.2712	0.034896	0.299104	No
	Symbol	Repetition	-0.1121	0.0949		Symbol	Repetition	0.0444	0.0986		-0.1565	-0.298104	0.073904	-0.148856	0.237656	Overlap
	Symbol	Spelling	-0.365	0.0892		Symbol	Spelling	0.2837	0.0699		-0.6487	-0.539832	-0.190168	0.146696	0.420704	No
	Symbol	Word	-0.5633	0.0892		Symbol	Word	0.2606	0.0591		-0.8239	-0.738132	-0.388468	0.144764	0.376436	No
	Trail	Tower	0.25	0.1231		Trail	Tower	0.6654	0.1029		-0.4154	0.008724	0.491276	0.463716	0.867084	Overlap
	Trail	Fluid	-0.6153	0.0869		Trail	Fluid	0.7452	0.0384		-1.3605	-0.785624	-0.444976	0.669936	0.820464	No
	Trail	Phoneme	-0.4141	0.0906		Trail	Phoneme	0.4488	0.0712		-0.8629	-0.591676	-0.236524	0.309248	0.588352	No
	Trail	Nonwread	-0.3082	0.0885		Trail	Nonwread	0.3934	0.0693		-0.7016	-0.48166	-0.13474	0.257572	0.529228	No
	Trail	Repetition	-0.2383	0.0892		Trail	Repetition	0.3432	0.1005		-0.5815	-0.413132	-0.063468	0.14622	0.54018	No
	Trail	Spelling	-0.2938	0.0877		Trail	Spelling	0.5686	0.0624		-0.8624	-0.465692	-0.121908	0.446296	0.690904	No
	Trail	Word	-0.5253	0.1114		Trail	Word	0.4534	0.0599		-0.9787	-0.743644	-0.306956	0.335996	0.570804	No
	Tower	Fluid	-0.1608	0.1347		Tower	Fluid	0.6403	0.0773		-0.8011	-0.424812	0.103212	0.488792	0.791808	No
	Tower	Phoneme	-0.2541	0.1415		Tower	Phoneme	0.2857	0.1683		-0.5398	-0.53144	0.02324	-0.044168	0.615568	Overlap
	Tower	Nonwread	0.1316	0.1227		Tower	Nonwread	0.0697	0.1317		0.0619	-0.108892	0.372092	-0.188432	0.327832	Overlap
	Tower	Repetition	-0.1952	0.1731		Tower	Repetition	0.0359	0.2388		-0.2311	-0.534476	0.144076	-0.432148	0.503948	Overlap
	Tower	Spelling	-0.6872	0.174		Tower	Spelling	0.4205	0.1541		-1.1077	-1.02824	-0.34616	0.118464	0.722536	No
	Tower	Word	-0.5495	0.1607		Tower	Word	0.2562	0.127		-0.8057	-0.864472	-0.234528	0.00728	0.50512	No
	Fluid	Phoneme	0.2325	0.083		Fluid	Phoneme	0.6821	0.0571		-0.4496	0.06982	0.39518	0.570184	0.794016	No
	Fluid	Nonwread	0.0594	0.0806		Fluid	Nonwread	0.6335	0.0493		-0.5741	-0.098576	0.217376	0.536872	0.730128	No
	Fluid	Repetition	0.2754	0.0909		Fluid	Repetition	0.493	0.0722		-0.2176	0.097236	0.453564	0.351488	0.634512	Overlap
	Fluid	Spelling	0.155	0.0936		Fluid	Spelling	0.7297	0.0487		-0.5747	-0.028456	0.338456	0.634248	0.825152	No
	Fluid	Word	0.332	0.0977		Fluid	Word	0.7796	0.0429		-0.4476	0.140508	0.523492	0.695516	0.863684	No
	Nonwread	Phoneme	0.315	0.0918		Nonwread	Phoneme	0.9524	0.1142		-0.6374	0.135072	0.494928	0.728568	1.17623	No
	Nonwread	Repetition	0.4736	0.1104		Nonwread	Repetition	0.5827	0.1512		-0.1091	0.257216	0.689984	0.286348	0.879052	Overlap
	Nonwread	Spelling	0.5427	0.095		Nonwread	Spelling	1.0707	0.0922		-0.528	0.3565	0.7289	0.889988	1.25141	No
	Nonwread	Word	0.0759	0.0965		Nonwread	Word	1.0304	0.0933		-0.9545	-0.11324	0.26504	0.847532	1.21327	No
	Phoneme	Repetition	0.1494	0.0955		Phoneme	Repetition	0.2387	0.1765		-0.0893	-0.03778	0.33658	-0.10724	0.58464	Overlap
	Phoneme	Spelling	0.2413	0.0893		Phoneme	Spelling	0.9114	0.1138		-0.6701	0.066272	0.416328	0.688352	1.13445	No
	Phoneme	Word	0.7519	0.0983		Phoneme	Word	0.9424	0.1007		-0.1905	0.559232	0.944568	0.745028	1.13977	Overlap
	Repetition	Spelling	0.1519	0.1183		Repetition	Spelling	0.5896	0.1551		-0.4377	-0.079968	0.383768	0.285604	0.893596	Overlap
	Repetition	Word	-0.1826	0.1086		Repetition	Word	0.7431	0.1328		-0.9257	-0.395456	0.030256	0.482812	1.00339	No
	Spelling	Word	0.5803	0.0961		Spelling	Word	0.9596	0.082		-0.3793	0.391944	0.768656	0.79888	1.12032	No
			SCA.g r	SCA.g SE				SCA r	SCA SE
		Average	-0.0734924	0.0948288			Average	0.456008	0.0886455
		Min	-0.7223	0.0356			Min	-0.0849	0.0235
		Max	0.7519	0.2095			Max	1.0707	0.2388
		N negative	36	0.545455			N negative	2	0.030303
		N positive	30	0.454545			N positive	64	0.969697

## Sheet: Supplementary Table S5
Table S5: SCA and SCA.g SNP heritability
		SCA				SCA.g				SCA to SCA.g
	Trait	SNP heritability (uncorrected)	SE	Lower CI	Upper CI	SNP heritability	SE	Lower CI	Upper CI	Significant Change in heritability
	Matrix	0.1533	0.042	0.07098	0.23562	0.1844	0.0383	0.109332	0.259468	No
	Memory	0.0405	0.0023	0.035992	0.045008	0.0304	0.0021	0.026284	0.034516	Yes
	Reaction	0.0747	0.0031	0.068624	0.080776	0.0685	0.0028	0.063012	0.073988	No
	Symbol	0.1132	0.0076	0.098304	0.128096	0.063	0.0065	0.05026	0.07574	Yes
	Trail	0.1522	0.0093	0.133972	0.170428	0.0522	0.0067	0.039068	0.065332	Yes
	Tower	0.1229	0.0392	0.046068	0.199732	0.1166	0.0379	0.042316	0.190884	No
	Fluid	0.2154	0.008	0.19972	0.23108	0.0729	0.0078	0.057612	0.088188	Yes
	Phoneme	0.2401	0.0399	0.161896	0.318304	0.2949	0.0347	0.226888	0.362912	No
	Nonword	0.2508	0.0283	0.195332	0.306268	0.2491	0.0259	0.198336	0.299864	No
	Repetition	0.0998	0.0321	0.036884	0.162716	0.1764	0.0274	0.122696	0.230104	No
	Spelling	0.2366	0.0293	0.179172	0.294028	0.1857	0.0257	0.135328	0.236072	No
	Word	0.193	0.0193	0.155172	0.230828	0.1093	0.0166	0.076764	0.141836	Yes
	Average	0.157708	0.0217			0.133617	0.0193667

## Sheet: Supplementary Table S6
Table S6: GWA significant hits
	SCA	Number of genomic loci		Number of lead SNPs		Number of Independent significant SNPs
		SCA.g	SCA	SCA.g	SCA	SCA.g	SCA
	Matrix	0	0	0	0	0	0
	Memory	4	10	4	10	4	11
	Reaction	27	39	29	41	69	104
	Symbol	3	1	3	1	7	5
	Trail	0	7	0	7	0	14
	Tower	0	0	0	0	0	0
	Fluid	2	89	2	104	2	256
	Phoneme	0	0	0	0	0	0
	Nonword	0	0	0	0	0	0
	Repetition	0	0	0	0	0	0
	Spelling	0	0	0	0	0	0
	Word	0	1	0	1	0	1
	g	37		42		108
	Key
	Number of genomic loci: The number of genomic (risk) loci defined from independent significant SNPs by merging LD blocks if they are less apart than the user defined distance. A genomic risk locus can contain multiple lead SNPs and/or independent significant SNPs.
	Lead SNPs: The number of lead SNPs identified from independent significant SNPs which are independent each other at r2 0.1.
	Independent significant SNPs: The number of independent significant SNPs which reached the user defined genome-wide significant P-value and are independent each other at the user defined r2.

## Sheet: Supplementary Table S7
Table S7: GWA significant SNPs and lead SNPs non g Memory
No	GenomicLocus	uniqID	rsID	chr	pos	p	nSNPs	nGWASSNPs	Independent Significant hit in uncorrected GWAS?	Reported in GWAS cataglogue?
1	1	2:44775055:C:G	rs7583741	2	44775055	1.28427e-08	190	154	No	No
2	2	2:58881672:C:G	rs7582485	2	58881672	2.47307e-10	23	20	Yes	Yes
3	3	16:30141985:C:T	rs55732507	16	30141985	9.07925e-09	44	37	Yes	Yes
4	4	22:26967163:C:T	rs12169970	22	26967163	1.05046e-09	35	24	No	No
	Key
	No : Index of independent significant SNPs
	GenomicLocus : Index of assigned genomic locus matched with "GenomicRiskLoci.txt". Multiple independent lead SNPs can be assigned to the same genomic locus.
	uniqID : Unique ID of SNPs consists of chr:position:allele1:allele2 where alleles are alphabetically ordered.
	rsID : rsID of the SNP.
	chr : chromosome
	pos : position on hg19
	p : P-value (from the input file).
	nSNPs : Number of SNPs which are in LD of the independent significant SNP given r2, including non-GWAS-tagged SNPs (which are extracted from the reference panel).
	nGWASSNPs : Number of GWAS-tagged SNPs which are in LD of the ind. sig. SNP given r2.
	Bold : lead SNPs defined at r2_2

## Sheet: Supplementary Table S8
Table S8: GWA significant SNPs and lead SNPs non g Reaction
No	GenomicLocus	uniqID	rsID	chr	pos	p	nSNPs	nGWASSNPs	Independent Significant hit in uncorrected GWAS?	Reported in GWAS cataglogue?
1	1	1:50443589:A:G	rs9659092	1	50443589	1.44159e-08	271	207	No	No
2	2	1:97298667:A:G	rs61786423	1	97298667	2.11831e-08	55	40	No	No
3	3	1:183272486:C:T	rs12748895	1	183272486	3.76593e-08	7	3	Yes	Yes
4	4	2:23973799:C:T	rs6751857	2	23973799	7.02886e-09	100	70	No	Yes
5	5	2:56472159:C:T	rs2869529	2	56472159	2.4021e-08	3	2	Yes	Yes
6	6	2:59951465:C:T	rs13028903	2	59951465	8.44854e-12	10	7	Yes	Yes
7	6	2:59970660:A:C	rs1442883	2	59970660	4.25968e-08	23	15	Yes	Yes
8	6	2:59988258:C:T	rs12474507	2	59988258	4.21406e-09	2	1	No	Yes
9	7	2:76394682:A:C	rs34743837	2	76394682	1.07308e-09	153	113	No	No
10	7	2:76404263:C:T	rs11126503	2	76404263	1.24147e-08	19	16	No	No
11	7	2:76473288:A:G	rs12464211	2	76473288	1.30689e-08	78	58	No	No
12	8	2:104059283:A:G	rs1433309	2	104059283	2.26629e-09	394	309	No	Yes
13	8	2:104069784:A:C	rs266067	2	104069784	3.62632e-10	12	10	Yes	Yes
14	8	2:104269262:A:T	rs264979	2	104269262	1.62264e-13	485	375	Yes	Yes
15	8	2:104354232:A:G	rs12712181	2	104354232	2.22759e-09	309	238	No	Yes
16	8	2:104479862:A:T	rs1441102	2	104479862	8.59663e-09	19	12	No	Yes
17	9	2:174928752:A:G	rs77998199	2	174928752	2.19844e-10	113	74	Yes	Yes
18	9	2:174957796:C:T	rs9636259	2	174957796	2.49742e-08	58	36	Yes	Yes
19	9	2:175082308:G:T	rs4131583	2	175082308	4.56944e-09	14	11	Yes	Yes
20	10	2:201083598:C:T	rs1729412	2	201083598	1.56516e-08	47	34	Yes	Yes
21	10	2:201180023:C:T	rs3820888	2	201180023	1.39898e-09	66	46	No	Yes
22	10	2:201240086:A:G	rs994280	2	201240086	9.96048e-09	24	21	No	Yes
23	11	4:89466335:A:G	rs11932693	4	89466335	4.73883e-08	37	27	No	Yes
24	12	4:106082120:A:G	rs13123752	4	106082120	8.63632e-09	45	28	No	Yes
25	13	5:111134058:A:T	rs77917390	5	111134058	2.40614e-08	4	4	Yes	Yes
26	14	5:111982773:C:G	rs11956702	5	111982773	3.96313e-08	6	6	No	No
27	14	5:111984534:A:G	rs72791200	5	111984534	1.81364e-10	2	2	Yes	Yes
28	14	5:112021399:A:G	rs7727738	5	112021399	5.17705e-11	187	139	Yes	Yes
29	14	5:112036634:A:C	rs56335290	5	112036634	7.96206e-13	5	4	Yes	Yes
30	14	5:112138888:C:G	rs2952615	5	112138888	4.01037e-09	263	188	Yes	Yes
31	15	5:139692515:G:T	rs6870103	5	139692515	7.2962e-13	105	79	Yes	Yes
32	16	6:130609154:A:G	rs10872358	6	130609154	4.30156e-08	376	275	No	No
33	17	7:44946241:C:T	rs2040879	7	44946241	1.16445e-10	18	15	Yes	Yes
34	17	7:44961337:A:G	rs55738054	7	44961337	1.55178e-08	96	81	Yes	Yes
35	18	7:123689194:A:T	rs7783359	7	123689194	2.19238e-08	68	50	Yes	Yes
36	19	9:76891412:C:T	rs2604271	9	76891412	2.18654e-08	58	38	Yes	Yes
37	19	9:76909386:C:T	rs2604268	9	76909386	2.31235e-09	242	190	Yes	Yes
38	20	11:45060671:A:G	rs1484399	11	45060671	1.23035e-08	13	10	Yes	Yes
39	20	11:45075492:C:T	rs4486613	11	45075492	1.38292e-08	3	3	No	No
40	20	11:45119847:A:G	rs11606697	11	45119847	2.52376e-08	12	7	No	No
41	20	11:45123931:C:G	rs73464507	11	45123931	2.51178e-09	4	3	Yes	Yes
42	20	11:45126783:C:T	rs875973	11	45126783	1.62911e-09	8	7	Yes	No
43	21	12:49389320:A:C	rs1054442	12	49389320	5.35161e-16	22	15	Yes	Yes
44	21	12:49457635:A:G	rs11168839	12	49457635	6.49784e-12	43	33	Yes	Yes
45	22	12:111719060:A:T	rs6490042	12	111719060	1.59162e-08	71	62	No	No
46	22	12:111910219:A:G	rs10774625	12	111910219	1.10653e-09	33	20	No	Yes
47	22	12:111926901:C:T	rs1029388	12	111926901	1.03541e-11	474	350	Yes	Yes
48	22	12:111976776:C:T	rs648997	12	111976776	4.58356e-13	35	30	Yes	Yes
49	22	12:112661263:G:T	rs7956202	12	112661263	1.52254e-09	414	295	No	Yes
50	22	12:112718510:A:C	rs10850024	12	112718510	3.83317e-10	72	54	Yes	No
51	23	13:58455528:A:C	rs1595217	13	58455528	4.61429e-08	224	166	No	Yes
52	23	13:58822051:A:G	rs4627212	13	58822051	1.27658e-08	18	14	Yes	Yes
53	24	17:44064851:C:T	rs8079215	17	44064851	1.94956e-10	11	7	Yes	Yes
54	24	17:44076063:C:T	rs2471738	17	44076063	6.7489e-12	36	20	No	Yes
55	24	17:44167366:A:C	rs10775404	17	44167366	3.23497e-18	66	24	No	Yes
56	24	17:44186478:A:G	rs117754181	17	44186478	2.61591e-08	3	2	Yes	Yes
57	24	17:44202690:C:T	rs8068300	17	44202690	2.94957e-10	63	28	No	No
58	24	17:44343902:A:G	rs2532345	17	44343902	8.45744e-13	6	1	No	Yes
59	24	17:44572068:A:G	rs3874943	17	44572068	2.56694e-14	28	3	No	Yes
60	24	17:44808360:A:G	rs35937770	17	44808360	2.01866e-13	6	3	Yes	Yes
61	24	17:44819595:G:T	rs17698176	17	44819595	7.02847e-16	73	15	No	Yes
62	24	17:44852612:A:C	rs62074125	17	44852612	3.9923e-13	10	3	Yes	Yes
63	25	18:34668147:G:T	rs323299	18	34668147	1.94313e-08	130	92	Yes	Yes
64	26	19:4044579:A:G	rs7351050	19	4044579	2.7958e-08	23	16	Yes	Yes
65	26	19:4056366:A:G	rs66534382	19	4056366	2.9266e-08	26	19	Yes	Yes
66	27	20:47590564:C:T	rs1115535	20	47590564	8.01706e-10	153	114	No	Yes
67	27	20:47685815:A:G	rs6019624	20	47685815	8.33952e-11	205	142	No	Yes
68	27	20:47701339:A:G	rs2075678	20	47701339	1.71721e-10	206	138	No	No
69	27	20:47723127:C:G	rs2426132	20	47723127	7.23065e-09	21	15	No	Yes
	Key
	No : Index of independent significant SNPs
	GenomicLocus : Index of assigned genomic locus matched with "GenomicRiskLoci.txt". Multiple independent lead SNPs can be assigned to the same genomic locus.
	uniqID : Unique ID of SNPs consists of chr:position:allele1:allele2 where alleles are alphabetically ordered.
	rsID : rsID of the SNP.
	chr : chromosome
	pos : position on hg19
	p : P-value (from the input file).
	nSNPs : Number of SNPs which are in LD of the independent significant SNP given r2, including non-GWAS-tagged SNPs (which are extracted from the reference panel).
	nGWASSNPs : Number of GWAS-tagged SNPs which are in LD of the ind. sig. SNP given r2.
	Bold : lead SNPs defined at r2_2

## Sheet: Supplementary Table S9
Table S9: GWA significant SNPs and lead SNPs non g Symbol
No	GenomicLocus	uniqID	rsID	chr	pos	p	nSNPs	nGWASSNPs	Independent Significant hit in uncorrected GWAS?	Reported in GWAS cataglogue?
1	1	7:44784697:C:T	rs799449	7	44784697	2.31595e-09	19	15	No	Yes
2	1	7:44865064:A:G	rs10278679	7	44865064	4.62344e-10	47	39	No	Yes
3	2	12:49385679:C:T	rs10875906	12	49385679	8.29248e-09	10	4	No	Yes
4	3	19:45395619:A:G	rs2075650	19	45395619	3.94927e-08	13	12	Yes	Yes
5	3	19:45396219:C:T	rs157582	19	45396219	1.32257e-08	8	5	Yes	Yes
6	3	19:45411941:C:T	rs429358	19	45411941	4.01715e-14	14	12	Yes	Yes
7	3	19:45427125:A:T	rs111789331	19	45427125	1.25619e-08	11	9	No	Yes
	Key
	No : Index of independent significant SNPs
	GenomicLocus : Index of assigned genomic locus matched with "GenomicRiskLoci.txt". Multiple independent lead SNPs can be assigned to the same genomic locus.
	uniqID : Unique ID of SNPs consists of chr:position:allele1:allele2 where alleles are alphabetically ordered.
	rsID : rsID of the SNP.
	chr : chromosome
	pos : position on hg19
	p : P-value (from the input file).
	nSNPs : Number of SNPs which are in LD of the independent significant SNP given r2, including non-GWAS-tagged SNPs (which are extracted from the reference panel).
	nGWASSNPs : Number of GWAS-tagged SNPs which are in LD of the ind. sig. SNP given r2.
	Bold : lead SNPs defined at r2_2

[truncated: 20 more sheets: Supplementary Table S10, Supplementary Table S11, Supplementary Table S12, Supplementary Table S13, Supplementary Table S14, Supplementary Table S15, Supplementary Table S16, Supplementary Table S17, Supplementary Table S18, Supplementary Table S19, Supplementary Table S20, Supplementary Table S21, Supplementary Table S22, Supplementary Table S23, Supplementary Table S24, Supplementary Table S25, Supplementary Table S26, Supplementary Table S27, Supplementary Table S28, Supplementary Table S29]
